# Supplementary material for: Machine learning approach for differentiating iron deficiency anemia and thalassemia using random forest and gradient boosting algorithms
Source: Research Square preprint supplement (doi:10.21203/rs.3.rs-5623304/v1), 2025-03-25
Supplement: Supplementary file 1 [file ca96fe105c10630a547a95e5.docx]

**Table S1.** Diagnostic performance of the RF and GB models for predicting binary outcomes (Thal [TT and TI] and IDA) in training dataset.

| Matrix | GB | RF |
| --- | --- | --- |
| Sensitivity (%) | 91.7 | 97.4 |
| Specificity (%) | 88.5 | 94.8 |
| Accuracy (%) | 90.5 | 96.4 |
| Kappa | 0.799 | 0.924 |
| AUC-ROC | 0.969 | 0.996 |

Thalassemia, Thal; TT, Thal trait; TI, Thal intermedia; IDA, iron deficiency anemia; GB, gradient boosting; RF, random forest; AUC-ROC, area under the receiver operating characteristic curve. Kappa and AUC-ROC are presented as median values.

**Table S2.** Diagnostic performance of the RF and GB models for predicting multiclass outcomes (Thal [TT and TI], IDA, and IDA with Thal) in training dataset.

| Matrix | GB | | | RF | | |
| --- | --- | --- | --- | --- | --- | --- |
| Thal | IDA | IDA with Thal | Thal | IDA | IDA with Thal |
| Sensitivity (%) | 87.2 | 84.9 | 78.0 | 92.9 | 89.5 | 87.0 |
| Specificity (%) | 90.1 | 92.4 | 94.2 | 92.6 | 96.2 | 97.2 |
| Accuracy (%) | 85.4 | | | 91.7 | | |
| Kappa | 0.748 | | | 0.854 | | |
| AUC-ROC | 0.957 | | | 0.986 | | |

Thal, thalassemia; TT, Thal trait; TI, Thal intermedia; IDA, iron deficiency anemia; GB, gradient boosting; RF, random forest; AUC-ROC, area under the receiver operating characteristic curve. Kappa and AUC-ROC are presented as median values.
